# Supplementary material
Source: publisher figshare collection journal article supplement (https://acs.figshare.com/ndownloader/files/3871204)
Supplement: Supplementary file 1 [file 3871204]

## Supplementary Information

Regulated dielectric loss of polymer composites from coating  
carbon nanotubes with a crosslinked silsesquioxane shell  
through free-radical polymerization

Da Sun<sup>a</sup>, Zheng Zhou<sup>b</sup>, Guang-Xin Chen<sup>a, b\*</sup>, Qifang Li<sup>b\*</sup>

a Key Laboratory of Carbon Fiber and Functional Polymers, Ministry of Education,  
Beijing University of Chemical Technology, Beijing 100029, P. R. China

b College of Material Science and Engineering, Beijing University of Chemical  
Technology, Beijing 100029, P. R. China

\*Corresponding author: Tel./Fax: +86 10 64421693, E-mail address:

[gxchen@mail.buct.edu.cn](mailto:gxchen@mail.buct.edu.cn) (G. X. Chen)

### **TEM image of POS@CNT-B15.**

The carbon nanotubes were also modified by the crosslinked MA-POSS with the same radical mechanism in the product of POS@CNT-B15 and POS@CNT-B20. Owing to the increased weight ratio of MA-POSS to MWCNT, the coated carbon nanotubes crosslinked each other and with POSS matrix. Instead of POSS coated MWCNT nanofiller, the final product looks like the MWCNT/crosslinked POSS composites, which is impossible to compound with polymers. A typical TEM image of POS@CNT-B1 was shown below:

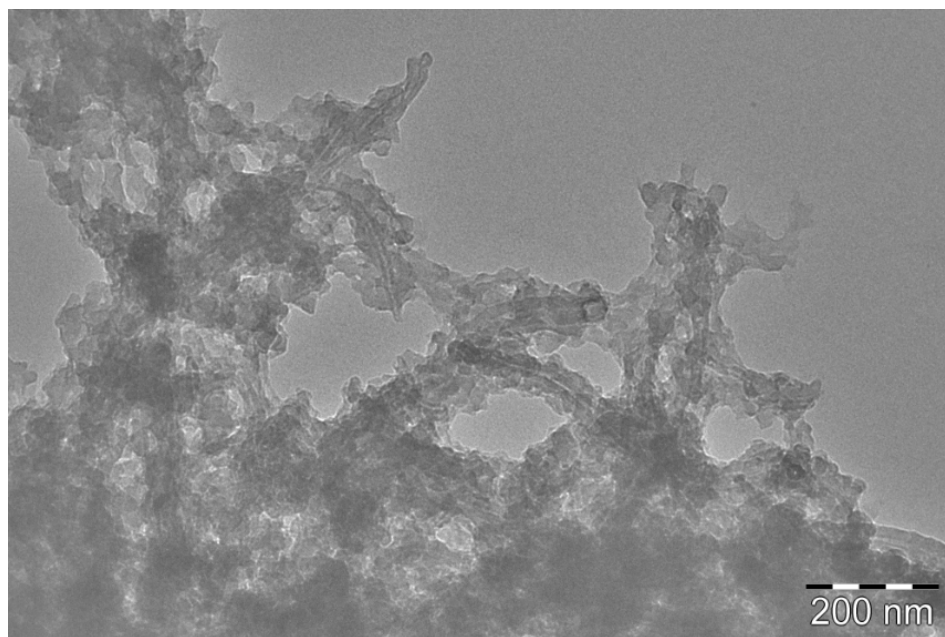

Figure S1 TEM image of POS@CNT-B15.

#### **1. The possible reactive process of MA-POSS-coated MWCNT.**

According to the results, free-radical initiators can initiate the monomers that contain the C=C bond to functionalize MWCNT and lead to controllable coating on the surface of MWCNT. Through our study, we determined a possible way of coating.

First, the initiators generate the radicals through decomposition. Second, the free radicals combine with MWCNT or MA-POSS, and then form the new reactivity center. Finally, the MA-POSSs react around the reactivity center and realize the coating of MWCNT, as shown in Figure S2.

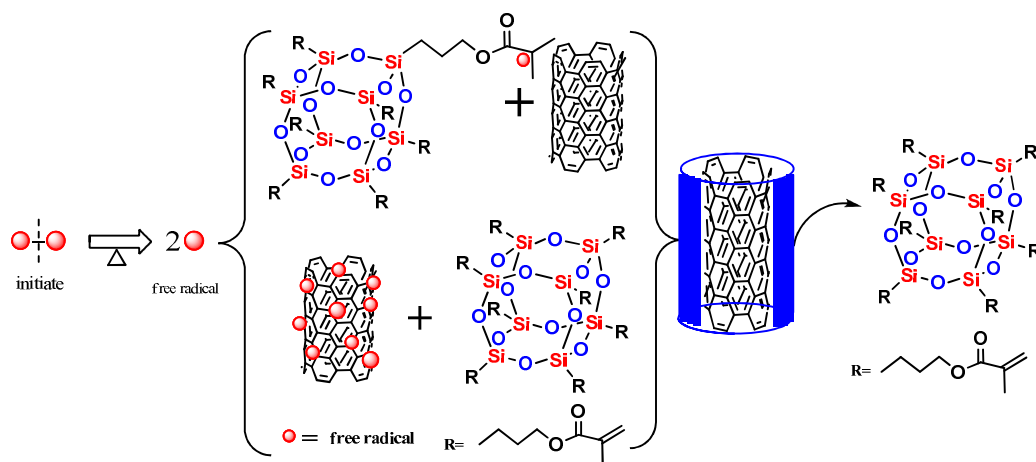

Figure S2 Possible reactive process of MA-POSS-coated MWCNT.

## REFERENCES

- [1] Fontana F, Minisci F, Vismara E. New General and Convenient Sources of Alkyl Radicals, Useful for Selective Syntheses. *Tetrahedron Lett.* 1988;29(16):1975-8.
- [2] Ying Y, Saini RK, Liang F, Sadana AK, Billups W. Functionalization of Carbon Nanotubes by Free Radicals. *Org Lett.* 2003;5(9):1471-3.
